# Supplementary material for: Enhancing the power conversion efficiency of polymer solar cells via selection of quinoxaline substituents
Source: Royal Society of Chemistry journal article supplement (doi:10.1039/c7nj03312e), 2017-01-01
Supplement: c7nj03312e1.pdf [file c7nj03312e1.pdf]

## Supplementary Material

### Enhancing Power Conversion Efficiency of Polymer Solar Cells via Selection of Quinoxaline Substituents

Özge Karagaçtı<sup>a</sup>, Sevki Can Cevher<sup>a</sup>, Gonul Hizalan<sup>a</sup>, Serife O. Hacıoğlu<sup>a</sup>, Levent Toppare<sup>a,b,c,d</sup>, Ali Cirpan<sup>a,b,c,e</sup>

a. Department of Chemistry, Middle East Technical University, 06800 Ankara, Turkey.

b. Department of Polymer Science and Technology, Middle East Technical University, 06800 Ankara, Turkey

c. Department of Biotechnology, Middle East Technical University, 06800 Ankara, Turkey

d. The Center for Solar Energy Research and Application (GUNAM), Middle East Technical University, 06800 Ankara, Turkey

e. Department of Micro and Nanotechnology, Middle East Technical University, 06800 Ankara, Turkey

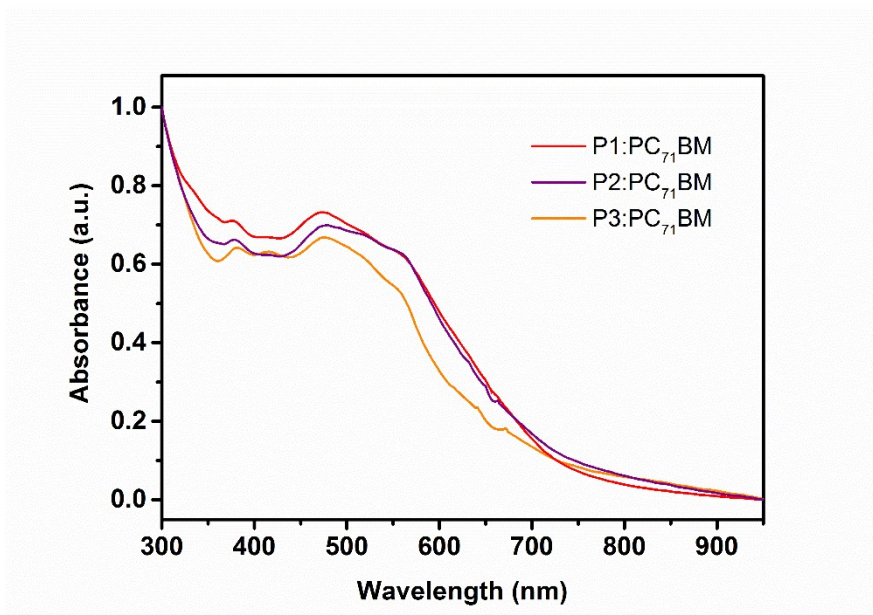

**Fig S1.** UV-Vis spectra of polymer:PCBM blends

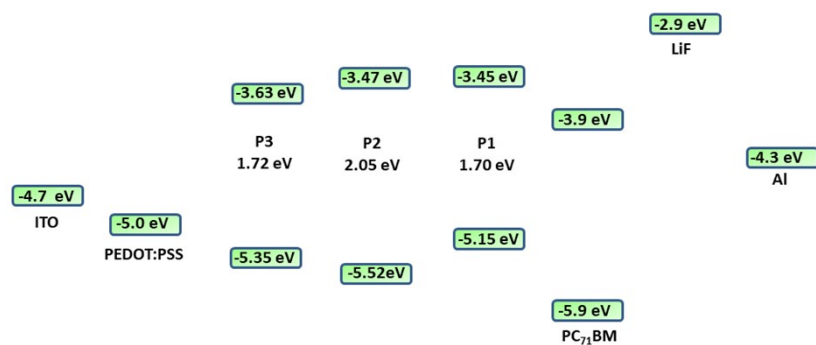

**Fig S2.** Energy Level diagram for ITO/PEDOT:PSS/ Polymer:PC<sub>71</sub>BM /LiF /Al device

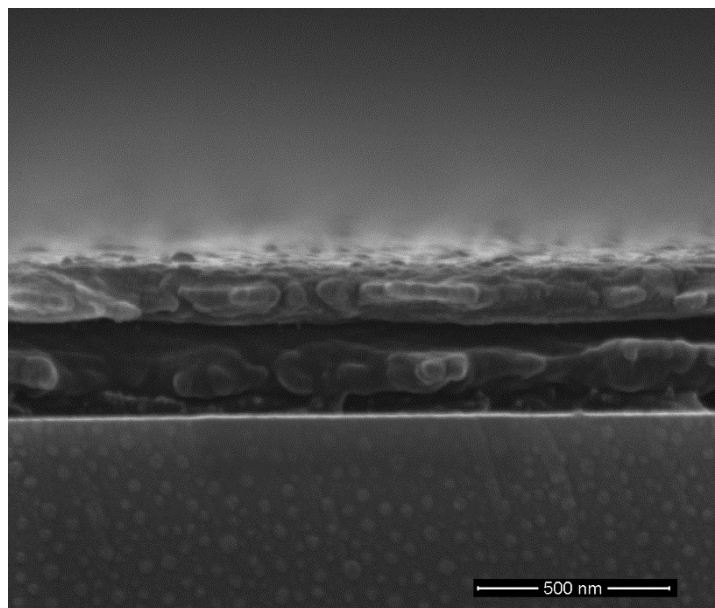

**Fig S3.** Cross sectional SEM image for the best performance solar cell based on P2:PC<sub>71</sub>BM (1:4)
